# Supplementary material
Source: PubMed Central journal article supplement (PMC3946123)
Supplement: 13280_2013_433_MOESM1_ESM.pdf [file 13280_2013_433_MOESM1_ESM.pdf]

## Appendix S1

### Questions for the interviews with agriculturists in the Amalfi Coast

| <b>Italian</b>                        | <b>English</b>                                        |
|---------------------------------------|-------------------------------------------------------|
| Numero ID                             | Number ID                                             |
| Comune                                | Municipality                                          |
| Frazione                              | Hamlet                                                |
| Data                                  | Date                                                  |
| Nome                                  | Name                                                  |
| Sesso                                 | Gender                                                |
| Età                                   | Age                                                   |
| Da quanto coltiva?                    | How long have you been cultivating (any crop)?        |
| Avete terrazzamenti?                  | Do you have terraces?                                 |
| Cosa ci coltiva?                      | What do you have planted on them?                     |
| Che superficie hanno?                 | What is the surface area of your land?                |
| Ne avete abbandonati una parte?       | Have you abandoned a part of them?                    |
| Perché?                               | Why?                                                  |
| Cosa c'era sopra?                     | Which crop(s) was on them?                            |
| E' conveniente quello che ci coltiva? | Is cultivation of this crop rewarding (economically)? |
| Perché no/sì?                         | Why so? Why not?                                      |
| Cambierebbe il tipo di coltivazione?  | Would you change the kind of cultivation/crop?        |
| Che tipo di terrazzamenti ha?         | What kind of terraces do you have?                    |
| Che tipo di manutenzione?             | Which kind of maintenance work do they need?          |
| Ogni quanto?                          | How often?                                            |

|                                        |                                                                         |
|----------------------------------------|-------------------------------------------------------------------------|
| La vegetazione naturale è un problema? | Does natural vegetation constitute a problem?                           |
| Ha notato cambiamenti nel paesaggio?   | Have you noticed any change in the landscape?                           |
| Ha notato cambiamenti nel clima?       | Have you noticed any change in climate/weather?                         |
| Come influiscono sulle piante?         | Do these changes affect the plants? How?                                |
| E sui terrazzamenti?                   | And is there any effect on the terraces?                                |
| Ha notato cambiamenti negli incendi?   | Have you noticed changes in fires?                                      |
| Brucia stoppe?                         | Do you burn dead plant material?                                        |
| Quando?                                | When?                                                                   |
| Ci sono state frane/ cedimenti?        | Have there been any landslides or subsiding phenomena on your terraces? |
| Dovuti a cosa?                         | In your opinion, what was the cause?                                    |
