# Supplementary material
Source: PubMed Central journal article supplement (PMC3946123)
Supplement: 13280_2013_433_MOESM2_ESM.pdf [file 13280_2013_433_MOESM2_ESM.pdf]

Appendix S2

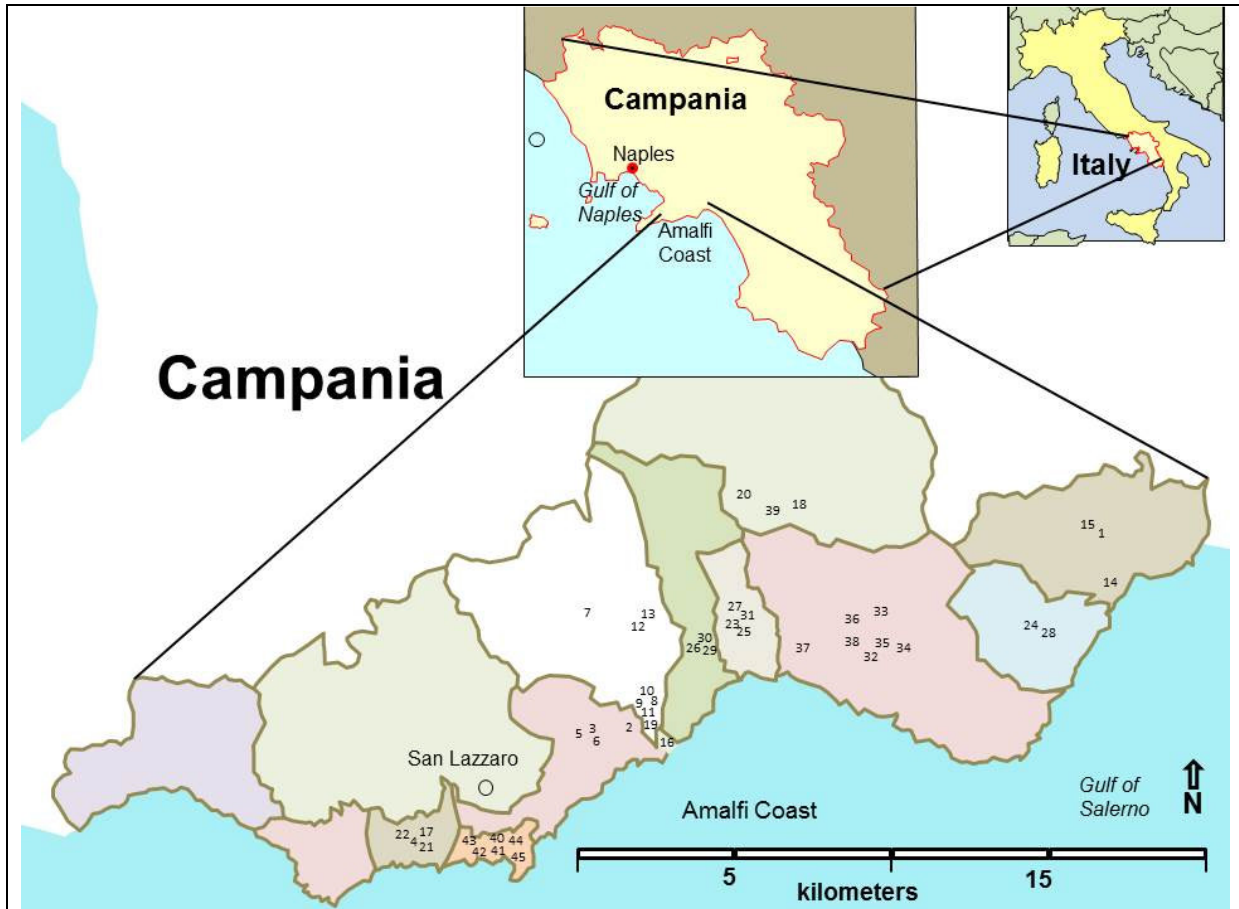

| ID | Municipality/Hamlet  | Gender | Age | ID | Municipality/Hamlet     | Gender | Age |
|----|----------------------|--------|-----|----|-------------------------|--------|-----|
| 1  | Vietri/Center        | M      | 66  | 24 | Cetara/Center           | M      | 60  |
| 2  | Amalfi/Pontone       | M      | 80  | 25 | Minori/Center           | F      | 76  |
| 3  | Amalfi/Center        | F      | 52  | 26 | Ravello/Torello         | M      | 64  |
| 4  | Furore/Center        | M      | 50  | 27 | Minori/Center           | M      | 75  |
| 5  | Amalfi/Center        | M      | 57  | 28 | Minori/Center           | M      | 65  |
| 6  | Amalfi/Center        | M      | 43  | 29 | Ravello/Torello         | M      | 62  |
| 7  | Scala/Center         | M      | 54  | 30 | Ravello/Torello         | M      | 78  |
| 8  | Scala/San Pietro     | M      | 50  | 31 | Minori/Center           | M      | 52  |
| 9  | Scala/San Pietro     | M      | 90  | 32 | Maiori/Center           | M      | 82  |
| 10 | Scala/San Pietro     | M      | 45  | 33 | Maiori/Center           | M      | 50  |
| 11 | Scala/San Pietro     | M      | 62  | 34 | Maiori/Center           | M      | 65  |
| 12 | Scala/Santa Caterina | M      | 75  | 35 | Maiori/Center           | M      | 78  |
| 13 | Scala/Santa Caterina | M      | 74  | 36 | Maiori/Center           | M      | 65  |
| 14 | Vietri/Dragonea      | M      | 73  | 37 | Maiori/Castello         | M      | 55  |
| 15 | Vietri/Center        | M      | 60  | 38 | Maiori/Center           | M      | 75  |
| 16 | Atrani/Center        | F      | 76  | 39 | Tramonti/Carbonara      | M      | 71  |
| 17 | Furore/Center        | M      | 73  | 40 | Conca dei Marini/Center | M      | 40  |
| 18 | Tramonti/Pucara      | M      | 37  | 41 | Conca dei Marini/Center | M      | 59  |
| 19 | Scala/Pontone        | M      | 60  | 42 | Conca dei Marini/Center | M      | 72  |
| 20 | Tramonti/Cesarano    | M      | 60  | 43 | Conca dei Marini/Center | M      | 80  |
| 21 | Furore/Center        | M      | 50  | 44 | Conca dei Marini/Center | M      | 49  |
| 22 | Furore/Center        | M      | 70  | 45 | Conca dei Marini/Center | M      | 32  |
| 23 | Minori/Center        | F      | 69  |    |                         |        |     |

Note: M=male; F=female. Numbers in the picture refer to the IDs of informants.
